# Supplementary material
Source: PubMed Central journal article supplement (PMC3151077)
Supplement: supp_M111.222539_jbc.M111.222539-1.pdf [file supp_M111.222539_jbc.M111.222539-1.pdf]

## Supplemental Figure S1

Joana S. Ferreira, Amanda Rooyackers, Kevin She, Luis Ribeiro, Ana Luísa Carvalho\*, Ann Marie Craig\*  
Activity and Protein Kinase C Regulate Synaptic Accumulation of NMDA Receptors Independently of  
GluN1 Splice Variant

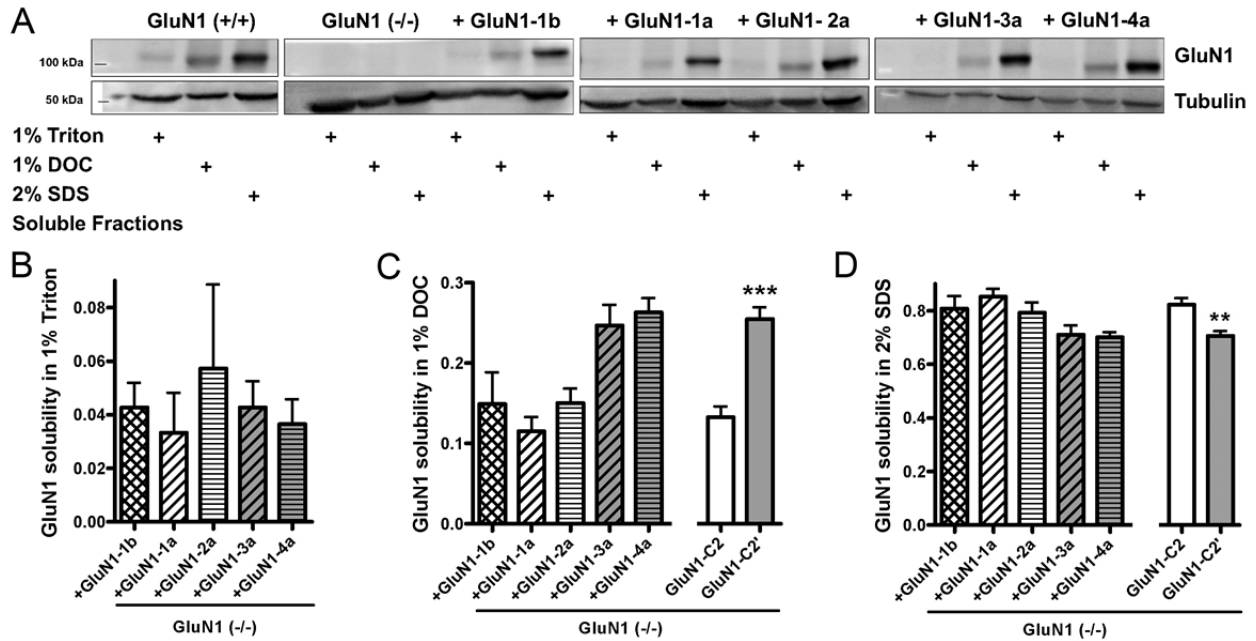

### Supplemental Fig. S1. The GluN1 C2 and C2' cassettes regulate detergent solubility of GluN1 splice variants.

(A) High density cortical cultures from GluN1 (-/-) mice were transduced at 3 DIV with lentivirus expressing GluN1 splice variants GluN1-1b, GluN1-1a, GluN1-2a, GluN1-3a or GluN1-4a. Proteins were sequentially extracted in 1% Triton, 1% DOC and 2% SDS. GluN1 protein levels were assessed by Western blot using an antibody against the GluN1 N-terminal region. Tubulin was used as a loading control. (B-D) The amount of GluN1 solubilized in 1% Triton X-100 (B), 1% DOC (C) and 2% SDS (D) was quantified and normalized to the total expression of GluN1, corresponding to the sum of all soluble fractions. Data are presented as mean  $\pm$  SEM of four independent experiments, and analysed by ANOVA (B,  $p > 0.1$ ; C,  $p < 0.005$ ; D,  $p < 0.05$ ). To determine the role of specific splice cassettes, data were then analyzed by grouping GluN1 variants according to cassette usage. Only groups showing a significant difference are graphed, specifically splice variants containing the C2' cassette (GluN1-3a + GluN1-4a) show higher solubility in DOC (\*\*\*)  $p < 0.001$ , t-test), and lower solubility in SDS (\*\*  $p < 0.01$ , t-test), than those containing the C2 cassette (GluN1-1a + GluN1-2a). Tubulin levels in the different detergent soluble fractions show no significant differences between splice variants (data not shown).
